# Supplementary material for: A Solution to the Transputer Data Distribution Problem.
Source: Royal Society of Chemistry journal article supplement (doi:10.1039/d3an01704d), 1996-01-01
Supplement: d3an01704d1.pdf [file d3an01704d1.pdf]

1 **Supplementary information**

2 **Improving design features and air bubble manipulation techniques for a single-step sandwich**  
3 **electrochemical ELISA incorporating commercial electrodes into capillary-flow driven**  
4 **immunoassay devices**

5 Phuritit Kaewarsa <sup>a</sup>, Melissa S. Schenkel <sup>b</sup>, Kira L. Rahn <sup>b</sup>, Wanida Laiwattanapaisal <sup>c</sup>, Charles S.  
6 Henry<sup>b,\*</sup>

7 <sup>a</sup> Graduate Program in Clinical Biochemistry and Molecular Medicine, Department of Clinical  
8 Chemistry, Faculty of Allied Health Sciences, Chulalongkorn University, Bangkok, 10330, Thailand

9 <sup>b</sup> Department of Chemistry, Colorado State, University, Fort Collins, Colorado, 80526, United States

10 <sup>c</sup> Biosensors and Bioanalytical Technology for Cell and Innovative Testing Research Unit, Department  
11 of Clinical Chemistry, Faculty of Allied Health Sciences, Chulalongkorn University, Bangkok, 10330,  
12 Thailand

13

14 **\* Corresponding author.**

15 Charles S. Henry, Ph.D.

16 Postal address: Department of Chemistry, Colorado State University, Fort Collins, Colorado, 80523,  
17 USA

18 Phone number: (970) 491-2852

19 E-mail addresses: [chuck.henry@colostate.edu](mailto:chuck.henry@colostate.edu)

20

21

# 1 SI Results

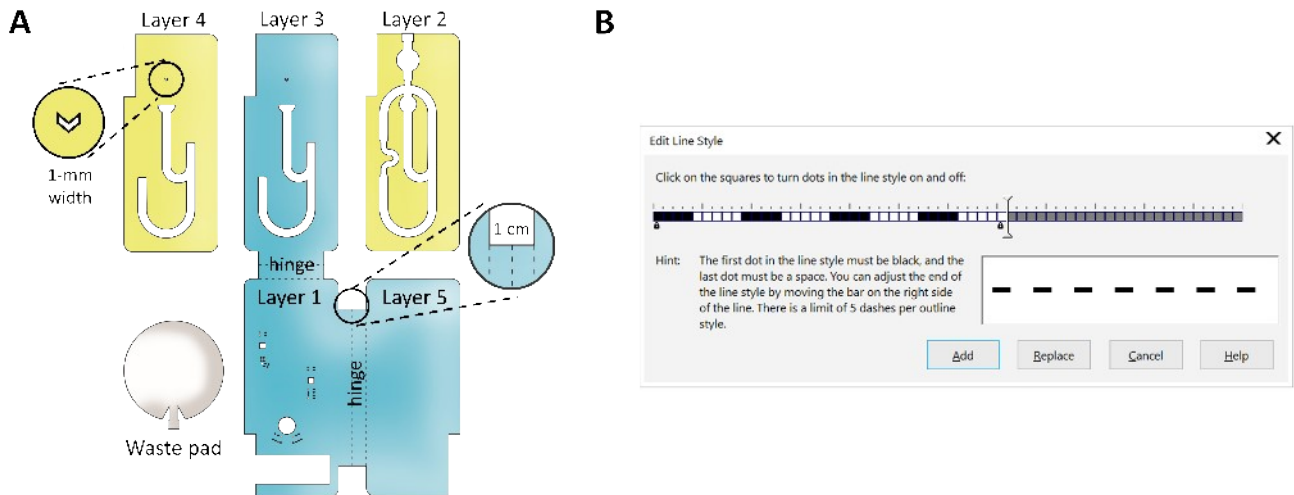

2  
3 **Figure S1.** The iceCaDI device design, A) the layout and details, B) the setting of the dashed line for the  
4 foldable hinge.

5

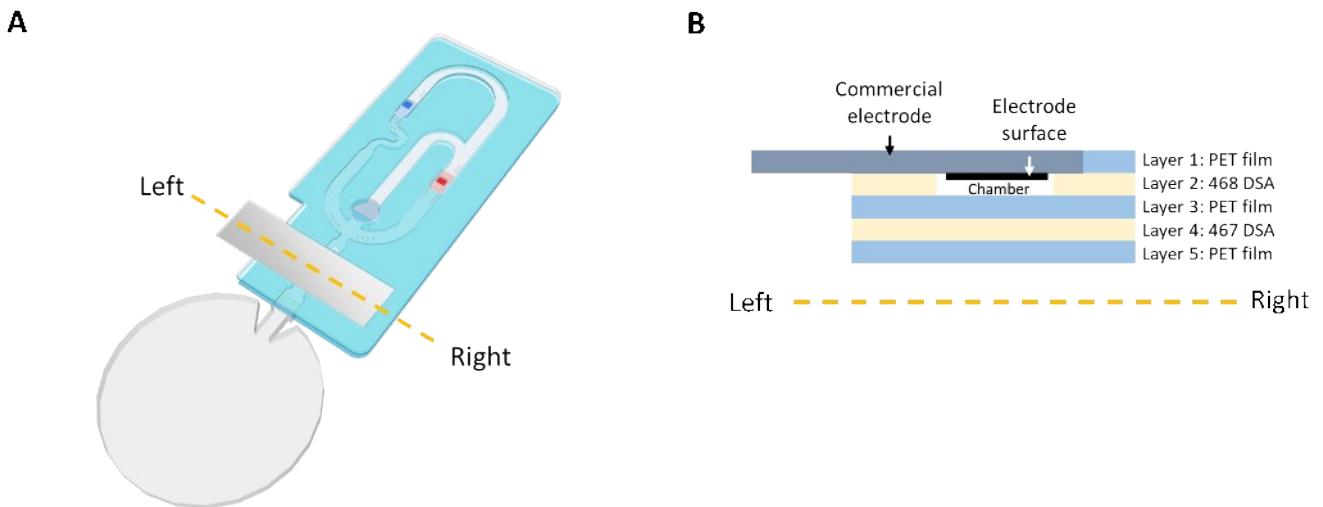

6  
7 **Figure S2.** A) The iceCaDI device after the final assembly and B) the cross-section area at the electrode  
8 chamber.

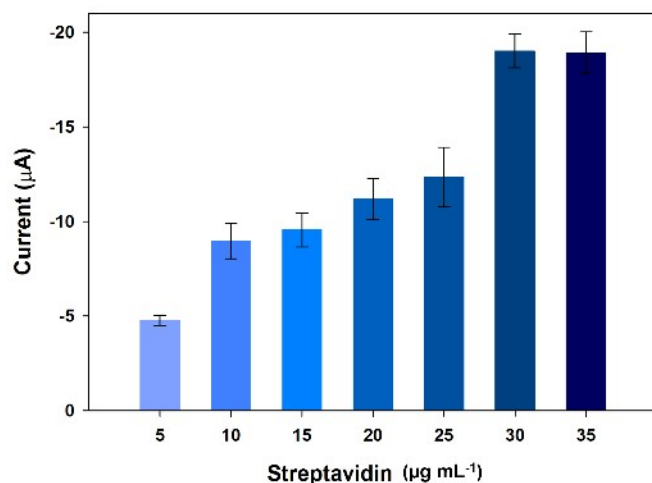

1

2 **Figure S3.** The optimization of streptavidin concentration using 25 µg mL<sup>-1</sup> of HRP (biotin) and 0.5%  
 3 BSA for blocking.

4

5

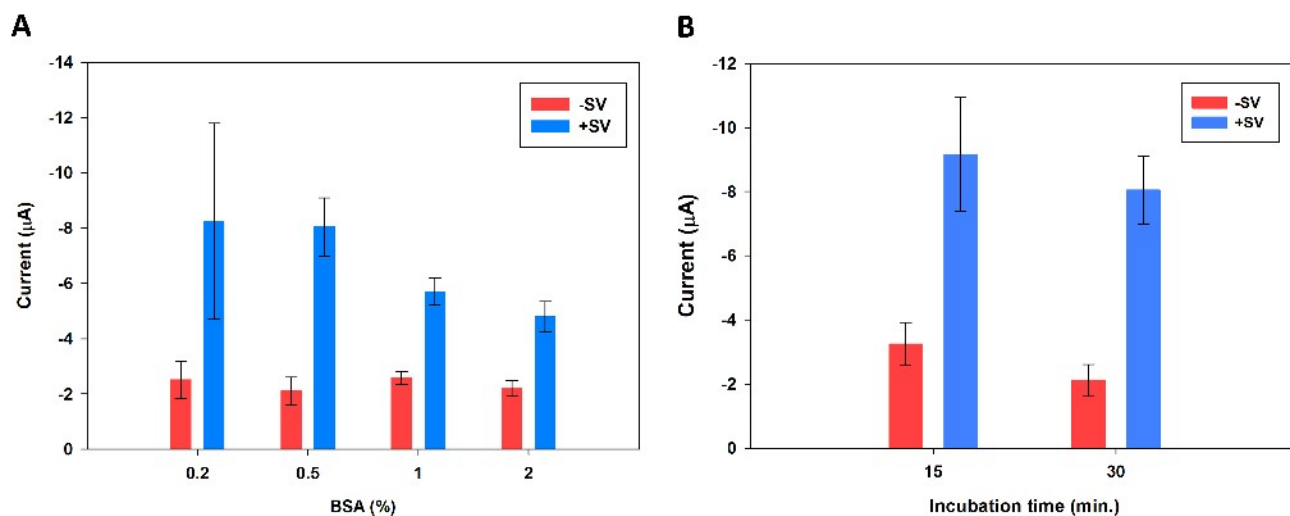

6

7 **Figure S4.** The optimization of blocking using BSA with or without 25 µg mL<sup>-1</sup> of streptavidin (SV), A)  
 8 The optimization of BSA concentration at 30 min of blocking time, B) The optimization of blocking time.

9 All experiments were obtained using 25 µg mL<sup>-1</sup> of HRP (biotin).

10

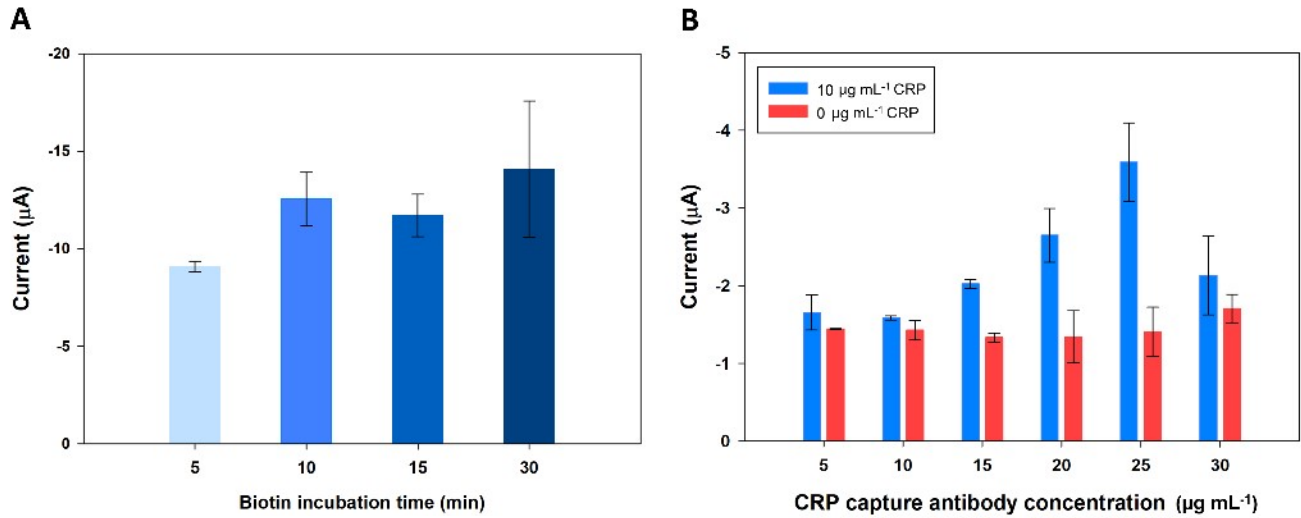

1

2 **Figure S5.** The optimization of CRP capture antibody (biotin) immobilization. A) The optimization of  
 3 biotin and streptavidin binding time obtained using 25 µg mL<sup>-1</sup> of HRP (biotin), B) The optimization of  
 4 CRP capture antibody (biotin) concentration with or without 10 µg/mL of CRP. All experiments were  
 5 performed with 25 µg mL<sup>-1</sup> of streptavidin for 1 hr and 0.5% BSA blocking for 30 min.

6

7

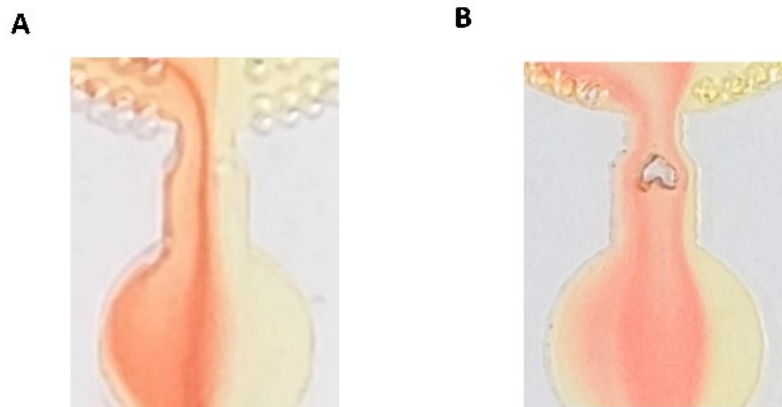

8

9 **Figure S6.** The flow in electrode chamber comparison, A) without the arrow-shaped obstacle, B) with the  
 10 arrow-shaped obstacle.

11

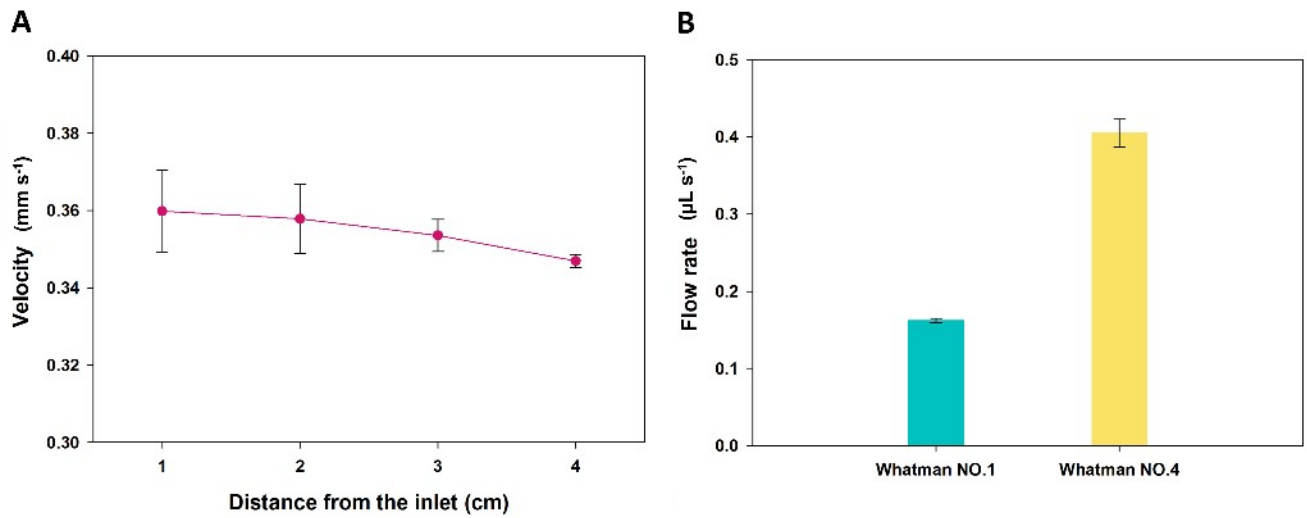

1  
 2 **Figure S7.** The flow study of the waste pad used, A) the velocity driven by the waste pad (Whatman  
 3 No.4.) over distance from the inlet, B) the flow rate comparison of the waste pad using Whatman No.1 vs  
 4 Whatman No.4 filter paper.  
 5

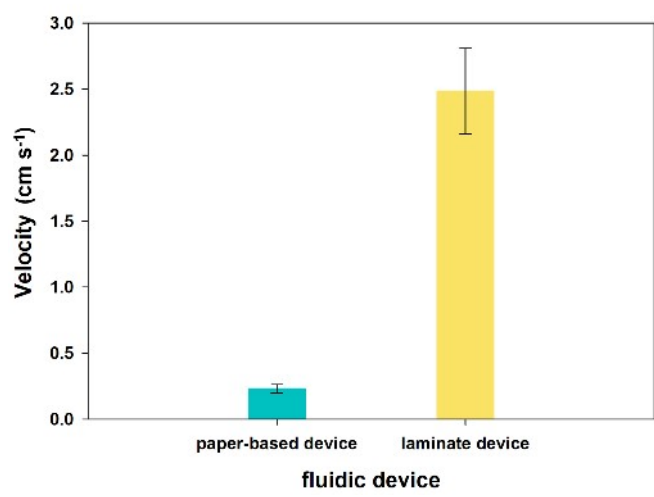

6  
 7 **Figure S8.** Velocity comparison of paper-based (nitrocellulose strip; CN 95) and laminated devices with  
 8 3-mm wide and 4-cm long channels. The velocity was measured at a 4-cm distance from the inlet.  
 9
